# Supplementary material
Source: Royal Society of Chemistry journal article supplement (doi:10.1039/d6ay00360e)
Supplement: d6ay00360e1.pdf [file d6ay00360e1.pdf]

## Supporting Information for

# **A quinoxaline-based conjugated microporous polymer-coating for solid phase microextraction of polycyclic aromatic hydrocarbons in environmental sample**

Gang Xiang <sup>\*1</sup>, Liushi Xu <sup>1</sup>, Zheng Li<sup>1</sup>, Fengping Liu<sup>1</sup>, Lian Huan<sup>1</sup>, Cuizhong Zhang<sup>1</sup>, Jing Sun<sup>1</sup>, Jinyun Peng<sup>1</sup>, Yunyu Li<sup>\*2</sup>

(1.College of Chemistry and Materials, Guangxi Minzu Normal University; Chongzuo Key Laboratory of Comprehensive Utilization Technology of Manganese Resources; Guangxi Key Laboratory for High-value Utilization of Manganese Resources, Chongzuo, 532200, China; 2.School of Physics and Electronic Information Engineering, Guangxi Minzu Normal University, Chongzuo, 532200, China)

\*Corresponding author

E-mail address: xgshmily@163.com (G. Xiang)

## Experimental Instruments and reagents

A gas chromatography-mass spectrometer (GC-MS, 7890A, Agilent Technologies, Santa Clara, CA, USA), X-ray powder diffractometer (XRD, Thermo Fisher Scientific, Waltham, MA, USA), EVO-18 scanning electron microscope (SEM, Carl Zeiss AG, Oberkochen, Germany), PerkinElmer-65 Fourier transform infrared spectrometer (FTIR, Shandong AoLaiDe Instrument Co., Ltd., Shandong, China), thermogravimetric analyzer (TGA, HQT-4, Beijing Hengjiu Experimental Equipment Co., Ltd., Beijing, China), automatic specific surface area analyzer (BET, Autosorb IQ, Quantachrome Instruments, Boynton Beach, FL, USA), X-ray photoelectron spectrometer (XPS, Thermo Fisher Scientific, Waltham, MA, USA), and solid-state nuclear magnetic resonance spectrometer ( $^{13}\text{C}$  NMR, 400 MHz, Bruker Corporation, Billerica, MA, USA) were used in this study.

Naphthalene (Nap), acenaphthylene (AcPy), acenaphthene (Acp), fluorene (Flu), phenanthrene (PA), anthracene (Ant), fluoranthene (FL), and pyrene (Pyr) were all of analytical grade and purchased from Saan Chemical Technology Co., Ltd. (Shanghai, China); their chemical structures (Fig. S1) and physicochemical properties are summarized in Table S1. Cyclohexanehexone octahydrate (98%) and 3-bromo-1,2-phenylenediamine (98%) were obtained from Aladdin Industrial Corporation (Shanghai, China). Tetrakis(triphenylphosphine)palladium(0) (99%) and 1,3,5-triethynylbenzene (M2, 98%) were purchased from Henan Pusi Chemical Products Co., Ltd. (Zhengzhou, China). All solvents and reagents were of analytical grade unless otherwise stated.

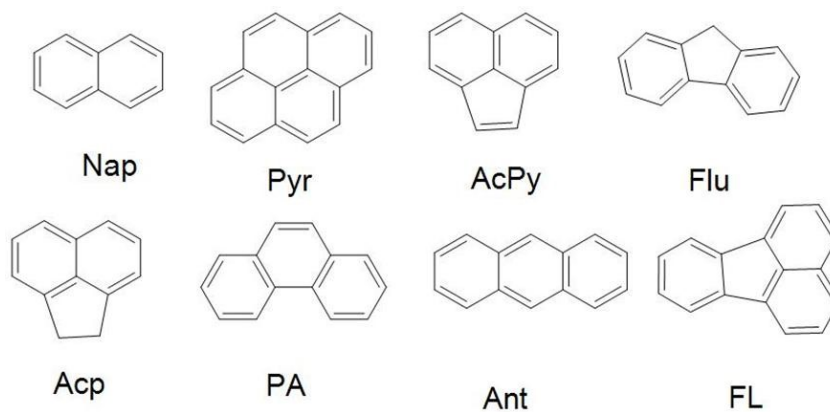

**Figure S1.** The structure of 8 PAHs

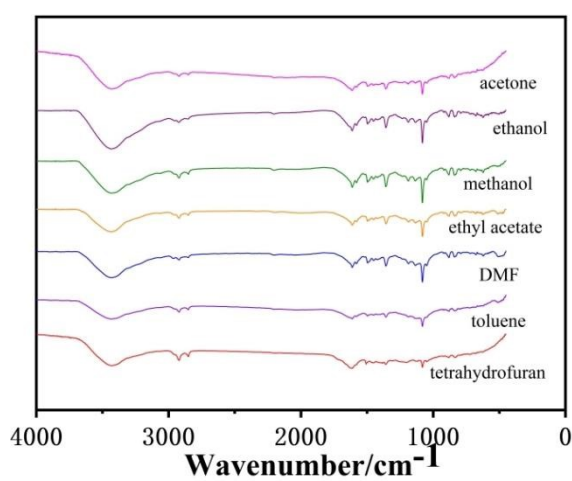

**Figure S2.** Chemical stability of CMP materials in various organic solvents

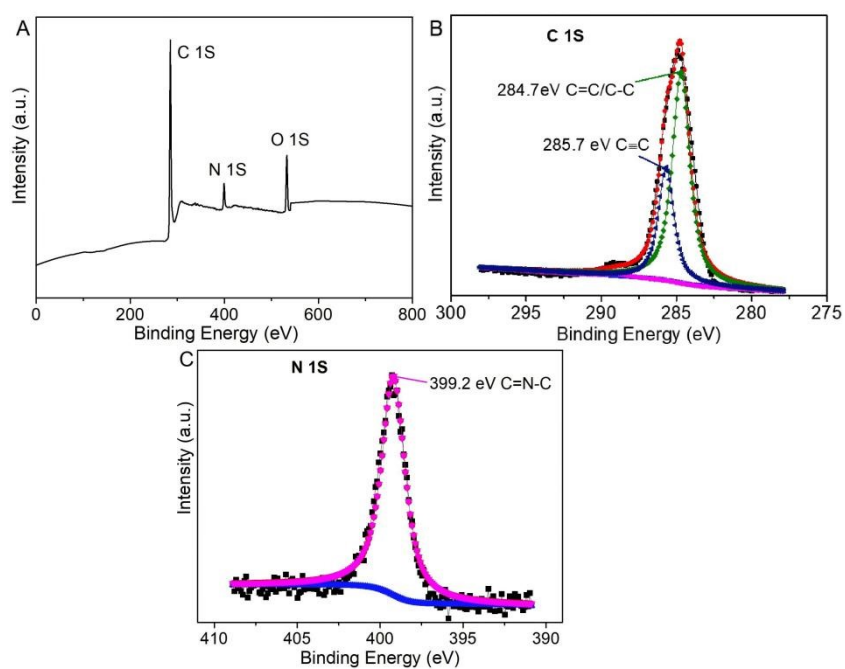

**Figure S3.** (A) XPS survey spectrum, (B) C 1s and (C) N 1s spectrum of CMP-1.

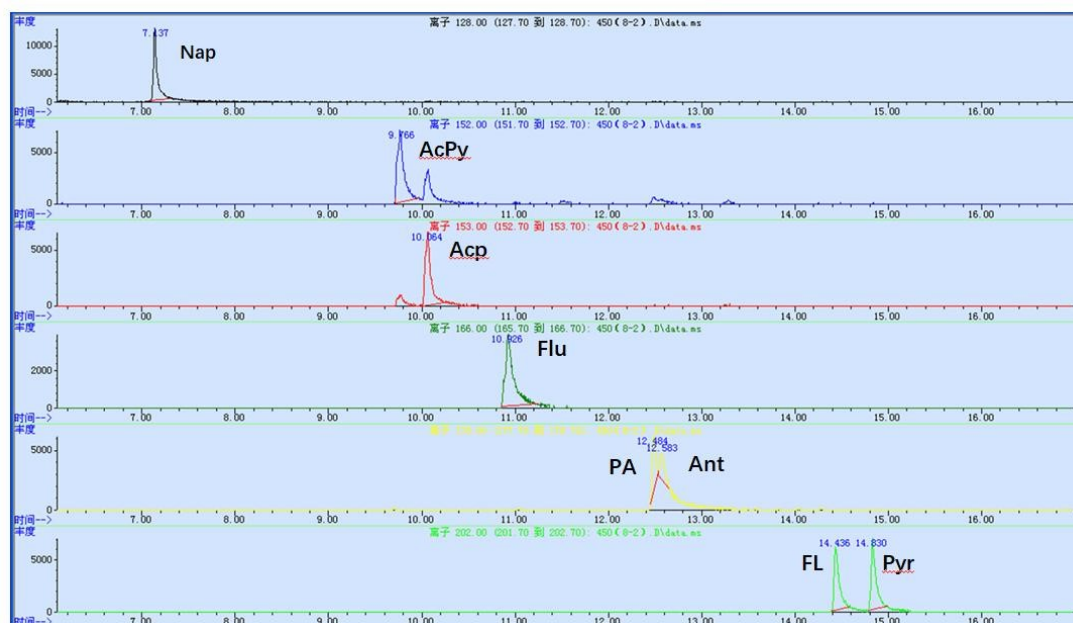

**Figure S4.** Ion chromatogram of extraction of 8 PAHs

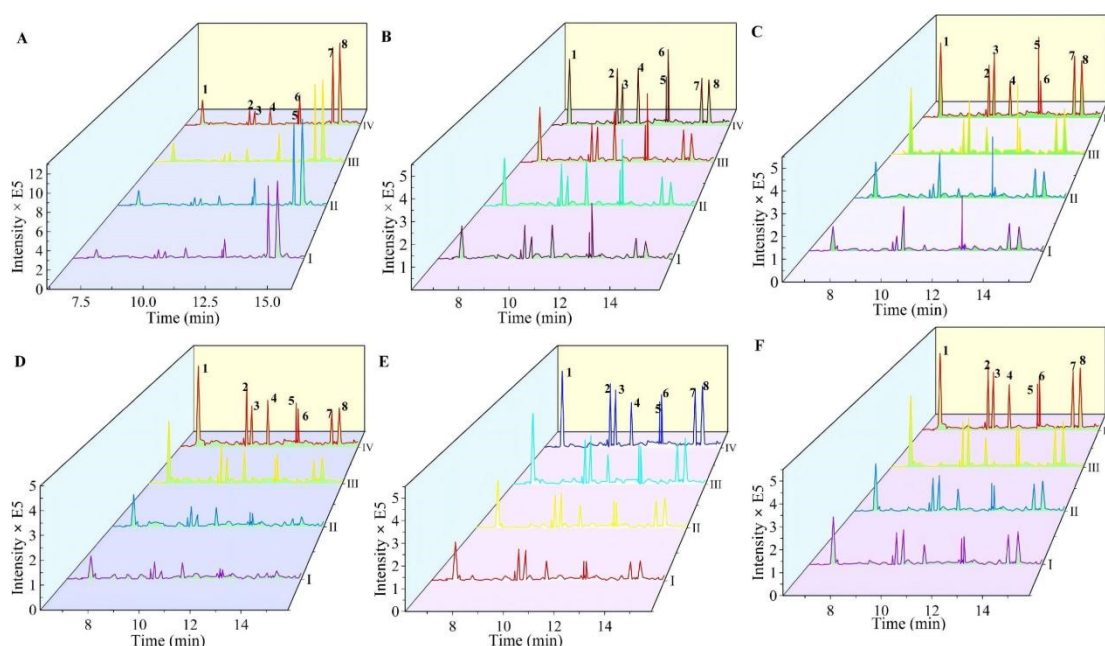

**Figure S5.** Chromatograms of polycyclic aromatic hydrocarbons (PAHs) in water samples (ABC) obtained by the established method: (I) unspiked; (II) spiked with 5 ng/mL; (III) spiked with 150 ng/mL; (IV) spiked with 300 ng/mL. Chromatograms of soil samples (DEF): (I) unspiked; (II) spiked with 30 ng/mL; (III) spiked with 300 ng/mL; (IV) spiked with 500 ng/mL.

(A)Artificial lake water, (B) Rain water, (C) Jinlong Lake water, (D) Sugarcane field soil, (E)Roadside soil, (F)Gas station soil,

1: Nap; 2: AcPy; 3: Acp; 4: Flu; 5: PA; 6: Ant; 7: FL; 8: Pyr

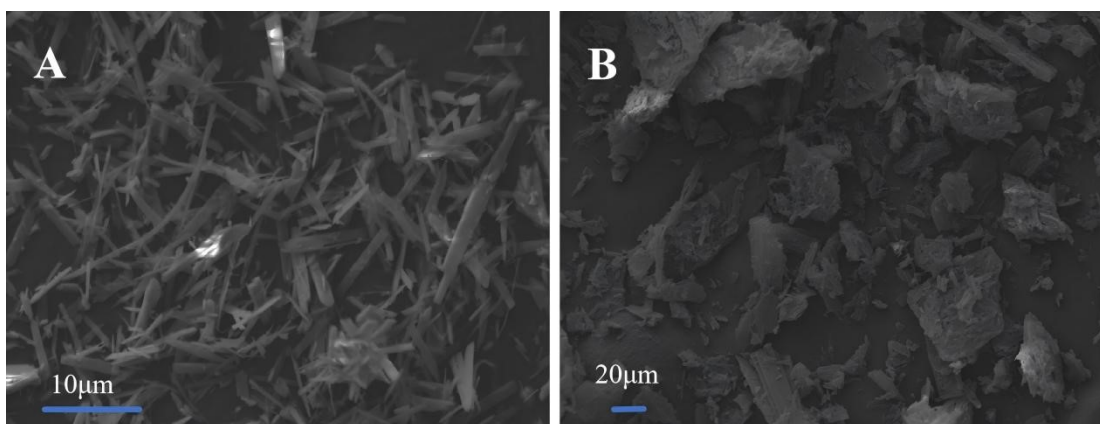

**Figure S6.** SEM images of (A) monomer M1 and (B) monomer M2

**Table S1** Pore properties of polymer CMP-1

| Sample | $^a S_{\text{BET}}$<br>( $\text{m}^2 \text{g}^{-1}$ ) | $^b S_{\text{Langmuir}}$<br>( $\text{m}^2 \text{g}^{-1}$ ) | $^c S_{\text{micro}}$<br>( $\text{m}^2 \text{g}^{-1}$ ) | $V_0$<br>( $\text{cm}^3 \text{g}^{-1}$ ) | BJH Adsorption average<br>pore diameter Porie size<br>( $\text{\AA}$ ) |
|--------|-------------------------------------------------------|------------------------------------------------------------|---------------------------------------------------------|------------------------------------------|------------------------------------------------------------------------|
| CMP-1  | 128.89                                                | 349.91                                                     | 20.65                                                   | 0.2                                      | 83.14                                                                  |

**Table S2 Qualitative and quantitative information of 8 polycyclic aromatic hydrocarbons**

| PAHs | Retention Time/min | Quantitative ion | Qualitative ion |
|------|--------------------|------------------|-----------------|
| Nap  | 7.137              | 128              | 57、105、77       |
| AcPy | 9.766              | 152              | 135、55、85       |
| AcP  | 10.064             | 153              | 57、76、91        |
| Flu  | 10.926             | 166              | 82、135、149      |
| PA   | 12.484             | 178              | 71、135、152      |
| Ant  | 12.583             | 178              | 85、135、152      |
| FL   | 14.436             | 202              | 57、85、152       |
| Pyr  | 14.830             | 202              | 73、100、135      |

**Table S3** Eight reference materials for polycyclic aromatic hydrocarbons

| <b>PAHs</b> | <b>Melting<br/>Point/°C</b> | <b>Boiling<br/>point/°C</b> | <b>Flash<br/>Point/°C</b> | <b>Density</b> |
|-------------|-----------------------------|-----------------------------|---------------------------|----------------|
| Nap         | 80-82                       | 218                         | 174                       | 0.98           |
| AcPy        | 78-82                       | 280                         | 122                       | 0.899          |
| AcP         | 90-94                       | 279                         | 135                       | 1.06           |
| Flu         | 114.77                      | 294                         | 151                       | 1.203          |
| PA          | 98-100                      | 340                         | 99-101                    | 1.063          |
| Ant         | 215                         | 340                         | 121                       | 1.24           |
| FL          | 109-110                     | 384                         | -18                       | 1.252          |
| Pyr         | 148                         | 393.5                       | 210                       | 1.271          |

**Table S4** Test results of 8 polycyclic aromatic hydrocarbons in actual samples  
(river water, rain water, Jinlong lake water)

| Samples                  |                       | Nap   | AcPy  | AcP   | Flu   | PA    | Ant   | FL     | Pyr    |
|--------------------------|-----------------------|-------|-------|-------|-------|-------|-------|--------|--------|
| Artificial<br>lake water | Found                 | 272.7 | 244.0 | 212.9 | 275.6 | 272.6 | 589.3 | 1173.0 | 1150.0 |
|                          | Recovery <sup>a</sup> | 102.9 | 90.3  | 92.1  | 103.9 | 107.5 | 116.4 | 106.7  | 82.3   |
|                          | RSD(%)                | ±7.2  | ±6.8  | ±9.8  | ±6.5  | ±9.3  | ±8.1  | ±9.5   | ±7.8   |
|                          | Recovery <sup>b</sup> | 86.4  | 88.5  | 91.3  | 87.2  | 90.7  | 87.7  | 84.0   | 83.5   |
|                          | RSD(%)                | ±5.3  | ±4.0  | ±6.0  | ±10.4 | ±12.9 | ±5.5  | ±2.5   | ±0.8   |
|                          | Recovery <sup>c</sup> | 84.2  | 88.7  | 87.7  | 85.7  | 86.6  | 105.7 | 102.9  | 83.5   |
| Rain<br>water            | RSD(%)                | ±4.0  | ±4.0  | ±6.2  | ±3.9  | ±3.8  | ±4.0  | ±1.5   | ±2.3   |
|                          | Found                 | 266.6 | 139.6 | 90.1  | 145.8 | 284.1 | 220.4 | 515.2  | 306.7  |
|                          | Recovery <sup>a</sup> | 102.8 | 105.9 | 101.2 | 88.1  | 94.7  | 111.7 | 114.6  | 98.2   |
|                          | RSD(%)                | ±5.5  | ±6.2  | ±7.4  | ±4.2  | ±7.9  | ±8.6  | ±5.4   | ±3.8   |
|                          | Recovery <sup>b</sup> | 91.4  | 93.7  | 82.0  | 90.8  | 94.2  | 83.5  | 95.7   | 84.5   |
|                          | RSD (%)               | ±3.3  | ±10.4 | ±6.8  | ±9.2  | ±9.8  | ±2.2  | ±4.5   | ±5.3   |
| Jinlong<br>Lake<br>water | Recovery <sup>c</sup> | 85.4  | 89.1  | 85.9  | 88.1  | 80.2  | 85.6  | 98.3   | 84.8   |
|                          | RSD(%)                | ±6.7  | ±8.4  | ±12.3 | ±2.8  | ±1.8  | ±2.6  | ±2.1   | ±2.6   |
|                          | Found                 | 339.1 | 354.8 | 333.2 | 494.9 | 393.2 | 604.4 | 284.6  | 243.6  |
|                          | Recovery <sup>a</sup> | 85.2  | 102.4 | 94.8  | 114.2 | 84.7  | 110.7 | 114.6  | 118.2  |
|                          | RSD(%)                | ±4.9  | ±5.0  | ±2.9  | ±3.7  | ±7.9  | ±2.6  | ±3.4   | ±6.8   |
|                          | Recovery <sup>b</sup> | 86.3  | 93.2  | 88.7  | 83.2  | 88.3  | 108.2 | 106.3  | 84.7   |
| Lake<br>water            | RSD(%)                | ±7.8  | ±2.6  | ±6.9  | ±8.6  | ±2.7  | ±1.3  | ±2.7   | ±7.8   |
|                          | Recovery <sup>c</sup> | 86.2  | 81.2± | 84.0  | 82.0  | 87.8  | 83.0  | 87.8   | 91.7   |
|                          | RSD(%)                | ±1.8  | 2.9   | ±4.9  | ±2.2  | ±7.6  | ±2.2  | ±6.0   | ±5.0   |

<sup>a</sup> Recovery of spiked 5 ng/mL; <sup>b</sup> Recovery of spiked 150 ng/mL; <sup>c</sup> Recovery of spiked 300 ng/mL

**Table S5** Test results of 8 polycyclic aromatic hydrocarbons in actual samples (sugarcane field soil, roadside soil, gas station soil)

| Samples              |                       | Nap   | AcPy  | AcP    | Flu   | PA    | Ant   | FL    | Pyr   |
|----------------------|-----------------------|-------|-------|--------|-------|-------|-------|-------|-------|
| Sugarcane field soil | Found                 | 231.9 | 237.9 | 155.5  | 215.8 | 208.1 | 155.8 | 144.2 | 151.6 |
|                      | Recovery <sup>a</sup> | 85.2  | 106.6 | 79.5   | 80.4  | 84.3  | 81.7  | 82.3  | 79.1  |
|                      | RSD(%)                | ±4.2  | ±6.6  | ±7.3   | ±5.1  | ±5.5  | ±2.5  | ±6.9  | ±2.0  |
|                      | Recovery <sup>b</sup> | 89.4  | 92.5  | 76.8   | 75.5  | 70.6  | 78.9  | 80.6  | 81.6  |
|                      | RSD(%)                | ±3.6  | ±4.4  | ±4.5   | ±4.7  | ±8.4  | ±6.4  | ±13.8 | ±6.3  |
|                      | Recovery <sup>c</sup> | 88.3  | 86.8  | 71.4   | 70.7  | 75.7  | 75.2  | 81.8  | 71.1  |
| RSD(%)               | ±3.9                  | ±2.1  | ±4.1  | ±4.5   | ±5.4  | ±11.3 | ±13.1 | ±7.7  |       |
| Roadside soil        | Found                 | 271.9 | 215.4 | 464.91 | 140.8 | 588.1 | 108.5 | 287.2 | 257.6 |
|                      | Recovery <sup>a</sup> | 83.2  | 96.3  | 79.7   | 75.0  | 78.6  | 78.2  | 85.7  | 77.4  |
|                      | RSD(%)                | ±4.5  | ±7.6  | ±5.3   | ±6.4  | ±2.5  | ±2.5  | ±6.9  | ±2.0  |
|                      | Recovery <sup>b</sup> | 86.7  | 87.9  | 72.7   | 74.8  | 71.6  | 78.1  | 82.4  | 70.8  |
|                      | RSD (%)               | ±4.3  | ±2.6  | ±3.1   | ±14.9 | ±2.4  | ±12.6 | ±8.4  | ±2.3  |
|                      | Recovery <sup>c</sup> | 90.0  | 97.0  | 75.0   | 72.5  | 71.0  | 79.6  | 81.0  | 73.0  |
| RSD(%)               | ±5.1                  | ±7.2  | ±2.5  | ±6.9   | ±4.3  | ±5.5  | ±3.3  | ±2.8  |       |
| Gas station soil     | Found                 | 344.8 | 307.6 | 382.5  | 257.6 | 324.8 | 265.5 | 272.4 | 279.7 |
|                      | Recovery <sup>a</sup> | 85.2  | 84.6  | 79.5   | 82.0  | 73.3  | 78.7  | 85.3  | 79.1  |
|                      | RSD(%)                | ±4.2  | ±6.6  | ±5.3   | ±3.1  | ±2.5  | ±2.5  | ±6.9  | ±2.0  |
|                      | Recovery <sup>b</sup> | 94.2  | 97.7  | 76.8   | 78.8  | 71.5  | 75.1  | 82.7  | 72.3  |
|                      | RSD(%)                | ±5.2  | ±6.0  | ±2.1   | ±2.3  | ±4.0  | ±10.7 | ±7.4  | ±9.7  |
|                      | Recovery <sup>c</sup> | 88.9  | 90.0  | 82.2   | 78.1  | 74.5  | 70.7  | 79.3  | 76.8  |
| RSD(%)               | ±4.5                  | ±5.1  | ±6.3  | ±4.2   | ±3.5  | ±7.9  | ±6.0  | ±6.6  |       |

<sup>a</sup> Recovery of spiked 30 ng/mL; <sup>b</sup> Recovery of spiked 300 ng/mL; <sup>c</sup> Recovery of spiked 500 ng/mL

**Table S6** Enrichment factors of 8 PAHs in different samples by coating

| Compound | Log $K_{o/w}$ | Artificial lake water EFs | Rain water EFs | Jinlong Lake water EFs | Water EFs | Sugarcane field soil EFs | Roadside soil EFs | Gas station soil EFs | Soil EFs |
|----------|---------------|---------------------------|----------------|------------------------|-----------|--------------------------|-------------------|----------------------|----------|
| Nap      | 3.35          | 4730                      | 4720           | 4030                   | 4493      | 960                      | 830               | 970                  | 920      |
| AcPy     | 3.94          | 2570                      | 3230           | 3160                   | 2987      | 710                      | 790               | 730                  | 743      |
| AcP      | 3.75          | 1590                      | 1870           | 2260                   | 1907      | 650                      | 610               | 520                  | 593      |
| Flu      | 4.18          | 2240                      | 2310           | 2890                   | 2480      | 340                      | 360               | 490                  | 397      |
| PA       | 4.46          | 1990                      | 2080           | 1930                   | 2000      | 820                      | 710               | 940                  | 823      |
| Ant      | 4.47          | 4420                      | 4640           | 4500                   | 4520      | 220                      | 270               | 360                  | 283      |
| FL       | 5.19          | 7060                      | 7180           | 7460                   | 7233      | 530                      | 490               | 530                  | 517      |

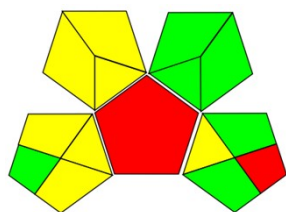

|                                                                                                                                                                                                                                                                                                                                                                                                                 |                                                                                                                                                                                                                                                                                        |
|-----------------------------------------------------------------------------------------------------------------------------------------------------------------------------------------------------------------------------------------------------------------------------------------------------------------------------------------------------------------------------------------------------------------|----------------------------------------------------------------------------------------------------------------------------------------------------------------------------------------------------------------------------------------------------------------------------------------|
| <p>Quantification</p> <p>Procedure for only qualification <input type="text"/></p>                                                                                                                                                                                                                                                                                                                              | <p>Reagents and Solvents</p> <p>&lt;10 mL (&lt; 10g) <input type="text"/></p> <p>Slightly toxic, slight irritant; NFPA health hazard score of 0 or 1. No <input type="text"/></p> <p>Highest NFPA flammability or instability score of 0 or 1. No special ha: <input type="text"/></p> |
| <p>Sample Preparation</p> <p>On-line or at-line <input type="text"/></p> <p>Chemical or physical <input type="text"/></p> <p>None <input type="text"/></p> <p>Under normal conditions <input type="text"/></p> <p>Extraction required <input type="text"/></p> <p>Micro-extraction <input type="text"/></p> <p>Green solvents / reagents <input type="text"/></p> <p>Simple treatments <input type="text"/></p> | <p>Instrumentation</p> <p>&lt;=1.5 kWh per sample <input type="text"/></p> <p>Hermetic sealing of the analytical process <input type="text"/></p> <p>&gt;10 mL (&gt;10 g) <input type="text"/></p> <p>Recycling <input type="text"/></p>                                               |

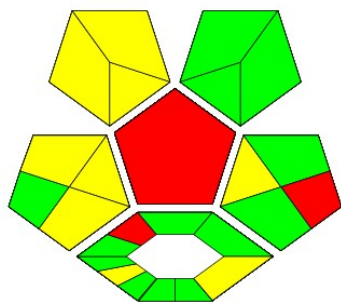

### SAMPLE PREPARATION AND ANALYSIS

#### Sample preparation

- |                            |                           |
|----------------------------|---------------------------|
| 1. Collection:             | On-line or at-line ▼      |
| 2. Preservation:           | Chemical or physical ▼    |
| 3. Transport:              | None ▼                    |
| 4. Storage:                | Under normal condition ▼  |
| 5. Type of method:         | Extraction required ▼     |
| 6. Scale of extraction:    | Micro-extraction ▼        |
| 7. Solvents/reagents used: | Green solvents/reagents ▼ |
| 8. Additional treatments:  | Simple treatments ▼       |

#### Reagents and solvents

- |                    |                                 |
|--------------------|---------------------------------|
| 9. Amount:         | < 10 mL (< 10 g) ▼              |
| 10. Health hazard: | Slightly toxic, slight irrita ▼ |
| 11. Safety hazard: | Highest NFPA flammabil ▼        |

#### instrumentation

- |                          |                           |
|--------------------------|---------------------------|
| 12. Energy:              | <= 1.5 kWh per sample ▼   |
| 13. Occupational hazard: | Hermetic sealing of the ▼ |
| 14. Waste:               | > 10 mL (>10 g) ▼         |
| 15. Waste treatment:     | Recycling ▼               |

#### Method type

- |                   |               |
|-------------------|---------------|
| Type of analysis: | Qualitative ▼ |
|-------------------|---------------|

### PRE-ANALYSIS PROCESSES

#### Yield and conditions

- |                       |                     |
|-----------------------|---------------------|
| I. Yield:             | >89% ▼              |
| II. Temperature/time: | Room temp., < 1 h ▼ |

#### Relation to Green Economy

- |                           |       |
|---------------------------|-------|
| III. Number of rules met: | 3-4 ▼ |
|---------------------------|-------|

#### Reagents and solvents

- |                     |                                 |
|---------------------|---------------------------------|
| IVa. Health hazard: | Slightly toxic, slight irrita ▼ |
| IVb. Safety hazard: | Highest NFPA flammabil ▼        |

#### Instrumentation

- |                          |                            |
|--------------------------|----------------------------|
| Va. Technical setup:     | Common setup ▼             |
| Vb. Energy:              | ≤1.5 kWh per sample ▼      |
| Vc. Occupational hazard: | Hermetization of analyti ▼ |

#### Workup and purification

- |                                         |                          |
|-----------------------------------------|--------------------------|
| Vla. End products workup, purification: | None or simple procese ▼ |
| Vlb. Purity:                            | <97% ▼                   |

#### E-factor

- |                      |                                                                     |
|----------------------|---------------------------------------------------------------------|
| VII. E-factor input: | <input type="text" value="0"/> <input type="button" value="Apply"/> |
|----------------------|---------------------------------------------------------------------|

1 2 3 4 5 6 7 8 9 10 11 12

Direct analytical techniques should be applied to avoid sample treatment.

Select the sampling procedure:

External sample pre- and treatment and batch analysis (reduced number of steps)

Modify the default weights

Weight:  1  2  3  4 Set weight

RE-GENERATE PLOT

scores: | (1) 0.3 | (2) 0.65 | (3) 0.33 | (4) 1.0 | (5) 0.75 | (6) 1.0 | (7) 0.45 | (8) 0.55 | (9) 0.0 | (10) 0.5 | (11) 1.0 | (12) 1.0 |

1 2 3 4 5 6 7 8 9 10

**Sample preparation placement**

Procedures that avoid excessive sample transportation and apply sample preparation that is integrated in analytical procedure are favoured.

Sample preparation placem ?

On-line/In situ

Modify the default weight:

1  2  3  4  5
